# Supplementary material
Source: publisher figshare collection journal article supplement (https://sage.figshare.com/ndownloader/files/14660903)
Supplement: Supplementary file 1 [file 14660903]

## Sheet: Appendix 2
Ref. ID	Author	Design	Country	Setting	Duration	Population	Population category	Participants	Intervention	Intervention aim	Results	Significant statistical improvments	Conclusion	1. Empowering and engaging people	2. Strengthening governance and accountability	3. Reorienting the model of care	4. Coordinating services	5. Creating an enabling environment	Quadruple aim
1	Allam et al., 2015	RCT	Switzerland	Online	4 months	- RA diagnosis - sufficient website using skills and Internet access	RA diagnoses,Ability to use telemedicine interventions	155: information group (n=30); social support group (n=29); gaming group (n=28); social support plus gaming group (n=28); control group (n=40)	Different types of access to online social support and gamification features	- improve health-related outcomes using online social support and gamification features	- increased physical activity over time in the group having access to social support sections plus gaming - decreased healthcare utilization in the groups having access to social support features and both social support features and gaming - more empowerment in the groups having access to either social support sections or gaming - more often use of website in the gaming group	yes	Evidence demonstrating a potential positive effect of gamification and online social support on health and behavioural outcomes.	- Health education,- Shared clinical decision making,- Personal care assessment,- Social participation in health,- Outreach programmes and services,- Expansion of primary care	- Decentralization,- Patient reported outcomes,- Performance evaluation	- Comprehensive package of services,- Health technology assessment ,- eHealth/mHealth	- Team-based care,- Intersectoral partnerships,- Merging of health sector and social services	- Change management strategies,- Information systems,- Multi-disciplinary teams	improving the individual experience of care,reducing the per capita costs of care for populations
2	Barton et al., 2016	NRS	USA	specialized rheumatology clinics	6 months	- RA diagnosis - limited health literacy or limited English language proficiency	RA diagnoses	166: Arm 1 (n=58); Arm 2 (n=48), Arm 3 (n=60)	low-literacy, multilingual medication guide and decision aid	- facilitate patient-clinician conversations about RA medications, improve medication changes	- Higher adequate RA knowledge post-visit in arm 3 than arm 1 (78% vs. 53%) - Lower mean decisional conflict in arms 2 and 3	limited	Enhancing knowledge and patient engagement with decision support tools may lead to medication choices better aligned with patient values and preferences in RA.	- Health education,- Shared clinical decision making,- Self-management,- Equity goals into health sector objectives,- Outreach programmes and services	- Health rights and entitlement ,- Patient reported outcomes	- Local health needs assessment,- Comprehensive package of services,- Gender and cultural sensitivity	- Care pathways,- Case management,- Care transition,- Team-based care		improving the individual experience of care,provider well-being
3	Child et al., 2015	Quantitative	UK	Remote (using telephone communication); hospital	/	- RA diagnosis - completed 1 year of follow-up on a patient initiated review appointment system	RA diagnoses	n=23	Nurse led patient-initiated appointment system	- to establish the experiences of using a patient initiated appointment system - to understand the process of the implementation - to identify potential improvements	Themes emerged in the data: - building patient confidence and empowerment - right place right time - safety - the everyday challenges of managing change	/	Clinics offering a patient initiated appointment system constitute a clear service improvement for rheumatoid arthritis outpatient care.	- Self-management,- Personal care assessment,- Social participation in health,- Expansion of primary care	- Decentralization,- Health rights and entitlement ,- Patient satisfaction surveys,- Patient reported outcomes	- Health technology assessment ,- eHealth/mHealth	- Care pathways,- Team-based care	- Change management strategies,- Information systems	improving the individual experience of care
4	Ciciriello et al., 2014	Mixed methods	Australia	/	/	- RA diagnoses - Changing pharmacological treatment	RA diagnoses,Changing pharmacological treatment	n=169	multimedia patient education program about methotrexate (MTX) treatment, and a new test of patient knowledge (MiRAK)	overcome limitations of other current patient education aproaches and improve patient knowledge about MTX	- multimedia patient education DVD developed with patient participation - improved MAX knowledge	/	The intervention was found to be effective for MTX patient education, user-friendly and can be self-administered by patients.	- Health education,- Shared clinical decision making,- Self-management,- Social participation in health	- Patient reported outcomes	- Local health needs assessment,- Health technology assessment ,- eHealth/mHealth			improving the individual experience of care
5	Davis et al., 2015	Quantitative,Cohort	USA	/	1 month	- RA diagnosis - bilateral tenderness or swelling	RA diagnoses,Symptoms (fatigue, swelling, elevated psychological distress)	144: CBT for pain group (n=52), mindful awareness and acceptance group (n=48), or education group (n=44	1. cognitive-behavioral therapy for pain 2. mindful awareness and acceptance therapy 3. arthritis education	- to evaluate the differential effects of distinct interventions for RA on cognitive, symptom, and affective responses to daily episodes of pain and stress	- Greater reductions in daily pain-related catastrophizing, morning disability, and fatigue with mindful awareness and acceptance therapy - Greater reductions in daily stress-related anxious affect with mindful awareness and acceptance therapy	yes	For individuals with RA, mindful awareness and acceptance therapy produces the broadest improvements in daily pain- and stress-reactivity relative to CBT and eduaction.	- Health education,- Shared clinical decision making,- Self-management,- Personal care assessment,- Civil society, user and patient groups,- Social participation in health	- Patient satisfaction surveys,- Patient reported outcomes,- Performance evaluation	- Multidisciplinary teams	- Care pathways,- Case management,- Team-based care,- Intersectoral partnerships,- Merging of health sector and social services	- Multi-disciplinary teams	improving the individual experience of care
6	Demmelmaier et al., 2015	Mixed methods : survey (quant) & interviews (qual)	Sweden	/	7 months	- RA diagnosis - independent in daily living - not reaching health-enhancing physical activity recommendations	RA diagnoses,Independent in daily living,Insufficient physical activity	n=191 (35 for qualitative part)	Health-enhancing physical activity (HEPA) program: circuit training at public training centres and physical activity in daily living, motivational text messages	increase physical activity	- increased self-reported physical activity (in 86% subjects) - participants reported having performed “regular” or “periodical” circuit training (78%) and physical activity in daily life (92 %)	yes	Health-enhancing physical activity outside health care is highly appreciated by a subgroup of the RA population. Professional coaching and prompts by text messages seem to be particularly useful facilitators.	- Health education,- Shared clinical decision making,- Self-management,- Personal care assessment,- Community delivered care,- Contracting out	- Patient reported outcomes,- Performance evaluation	- Comprehensive package of services,- Multidisciplinary teams ,- eHealth/mHealth	- Care pathways,- Team-based care,- Intersectoral partnerships		improving the individual experience of care
7	Dougados et al., 2015	RCT	France	secondary and/or tertiary care settings	6 months	- RA diagnosis - stable disease activity (at least 3 months) - no planned surgery	RA diagnoses,Low/stable disease activity	970: self-assessment group (1) (n=488); comorbidity group (2) (n=482)	1st arm: Comorbidity assessment and advice provided by nurses 2nd arm: Self-assessment done by patients using a nurse-led video programme and a booklet and disease activity calculator	1st arm: improve monitoring and comorbidity measures 2nd arm: improve self-assessment of disease activity on the management	1st arm: The number of measures taken per patient was statistically higher in the comorbidity group. 2nd arm: Drug therapy was adapted more frequently in the self-assessment group.	yes	This study demonstrates the short-term benefit of a nurse-led programme on RA comorbidity management and the impact of patient self-assessment of disease activity on RA treatment intensification.	- Health education,- Shared clinical decision making,- Self-management,- Personal care assessment,- Expansion of primary care	- Decentralization,- Clinical governance,- Patient reported outcomes,- Performance evaluation	- Comprehensive package of services,- eHealth/mHealth	- Care pathways,- Case management,- Team-based care	- Change management strategies,- Information systems,- Workforce training	improving the individual experience of care,improving the health of populations,reducing the per capita costs of care for populations,provider well-being
8	Evans et al., 2013	RCT	USA	Yoga studio	6 weeks	- RA or juvenile idiopathic arthritis diagnosis (≥6mo) - female (mean age=28 y).	RA diagnoses	30: intervention group (n=14); control group (n=16)	6-week twice/week Iyengar yoga program	- to improve the quality of life (including pain and disability and psychological functioning in patients)	- significantly greater improvement on standardized measures of health-related quality-of-life, pain disability, general health, mood, fatigue, acceptance of chronic pain and self-efficacy regarding pain at post treatment	yes	IY intervention is a feasible and safe adjunctive treatment for young people with RA, leading to improved health related quality of life, pain disability, fatigue, and mood benefits.	- Self-management,- Personal care assessment,- Community delivered care,- Community health workers,- Contracting out,- Expansion of primary care	- Patient reported outcomes	- Comprehensive package of services,- Multidisciplinary teams	- Care pathways,- Team-based care,- Merging of health sector and social services		improving the individual experience of care,improving the health of populations
9	Feldthusen et al., 2016	RCT	Sweden	outpatient rheumatology clinic	6 months	- RA diagnosis (>3y) - >6mo stable pharmacological treatment - disease activity level and fatigue scores	RA diagnoses,Low/stable disease activity,Symptoms (fatigue, swelling, elevated psychological distress)	Intervention-group (n=36) and control-group (n=34)	Person-centered physical therapy led by a physical therapist	- to improve fatigue levels and fatigue-related variables of general and mental health	- Intervention reduced general fatigue score - Trends towards improvements across multidimensional aspects of fatigue	yes	Person-centered physical therapy reduces general fatigue and shows promise as a strategy to augment the self-management of fatigue related to RA.	- Shared clinical decision making,- Self-management,- Personal care assessment,- Social participation in health	- Patient reported outcomes	- Multidisciplinary teams	- Care pathways,- Case management,- Team-based care,- Merging of health sector and social services		improving the individual experience of care
10	Ferwerda et al., 2017	RCT	the Netherlands	- hospital - participant's home (online)	12 months	RA patients with elevated levels of distress	RA diagnoses,Symptoms (fatigue, swelling, elevated psychological distress)	133: control group (n = 71): standard care - intervention group (n = 62): standard care + intervention	individualy tailored, therapist-guided internet-based cognitive-behavioral treatment	larger improvements in the primary outcome measures of psychological and physical functioning, and a lower impact of RA on daily life	intervention group reported large improvements in psychological functioning, less depressed mood, negative mood, and anxiety during the course of the 1-year follow-up period	yes	guided internet-based cognitive-behavioral therapy is a promising development to aid patients with psychological distress particularly in improving psychological functioning	- Health education,- Shared clinical decision making,- Self-management,- Personal care assessment,- Social participation in health,- Expansion of primary care	- Patient satisfaction surveys,- Patient reported outcomes	- Comprehensive package of services,- Health technology assessment ,- Multidisciplinary teams ,- eHealth/mHealth	- Care pathways,- Case management,- Team-based care,- Merging of health sector and social services	- Information systems,- Multi-disciplinary teams	improving the individual experience of care,improving the health of populations
11	Fraenkel et al., 2015	RCT	USA	Rheumatology department; at home/outside of the clinic	2 months	RA diagnoses	RA diagnoses	125: intervention group (n=62); control group (n=63)	A web-based decision support tool	- effectively inform patients and promote high quality decision making - to examine the potential value of a theory-based, interactive decision support tool	- favorable changes in objective knowledge, subjective knowledge, and value clarification at 2 weeks - improvements in subjective knowledge and value clarification persisted at 8 weeks - more patients with an informed choice (32% vs 13%, p=0.02)	limited	Use of a decision support tool at the time of decision making resulted in improved objective and subjective knowledge, as well as value clarity, compared to usual care, although not all improvements were sustained.	- Health education,- Shared clinical decision making,- Self-management,- Personal care assessment	- Patient reported outcomes,- Performance evaluation	- Comprehensive package of services,- eHealth/mHealth	- Care pathways,- Case management,- Team-based care	- Change management strategies,- Information systems	improving the individual experience of care,reducing the per capita costs of care for populations
12	Hammond et al., 2017	RCT	England	rheumatology out-patient clinic	9 months	employed people with RA, undifferentiated inflammatory arthritis (IA) and psoriatic arthritis (PsA)	RA diagnoses,RA or other rheumatic disease,Employment status	55: control - self-help information only (n=26); intervention (n=29)	one-on-one job retention vocational rehabilitation (VR) + work self-help information	improving job retention, decreasing work disability, absenteeism and presenteeism	intervention group: reduced presenteeism, absenteeism, perceived risk of job loss and improved pain and health status	yes	job retention VR provided by VR trained occupational therapist is an effective, acceptable, and deliverable intervention for employed people with RA	- Self-management,- Personal care assessment,- Social participation in health,- Expansion of primary care	- Patient satisfaction surveys,- Patient reported outcomes,- Performance evaluation	- Comprehensive package of services,- Primary care with family and community-based approach,- Multidisciplinary teams	- Care pathways,- Case management,- Team-based care	- Workforce training,- Multi-disciplinary teams	improving the individual experience of care,improving the health of populations,reducing the per capita costs of care for populations,provider well-being
13	Knittle et al., 2015	RCT	the Netherlands	outpatient rheumatology department in a medical center	5 weeks	sedentary patients with RA (activity level below the Dutch guideline for healthy PA)	RA diagnoses,Insufficient physical activity	78: control group (n=40); intervention group (n=38)	group education session plus a motivational interview and 2 self-regulation coaching sessions	to increase leisure time PA, autonomous motivation and self-efficacy	Significant treatment effects were found for leisure-time PA, active days/week, self-efficacy and autonomous motivation	yes	Promoting PA, supporting patient autonomy and teaching self-regulation skills may improve long-term maintenance of PA. The intervention is more effective and less resource demanding than some more action focused PA interventions.	- Health education,- Self-management,- Personal care assessment,- Community delivered care,- Social participation in health,- Peer support ,- Expansion of primary care	- Patient reported outcomes	- Local health needs assessment,- Multidisciplinary teams ,- Home and nursing care	- Care pathways,- Case management,- Team-based care,- Incentives for care coordination	- Transformational and distributed leadership,- Multi-disciplinary teams	improving the individual experience of care,reducing the per capita costs of care for populations
14	Knittle et al., 2016	RCT	the Netherlands	outpatient rheumatology department in a medical center	6 months	sedentary patients with RA (activity level below the Dutch guideline for healthy PA)	RA diagnoses,Insufficient physical activity	78: control group (n=40); intervention group (n=38)	Follow-up on: group education session plus a motivational interview and 2 self-regulation coaching sessions	to increase leisure time PA, autonomous motivation and self-efficacy,	maintenance of PA from posttreatment to follow-up (6 months later) was mediated by greater autonomous motivation and use of self-regulation skills.	/	Greater autonomous motivation and use of self-regulation skills predict maintenance of PA following a motivational interviewing and self-regulation coaching intervention.	- Health education,- Shared clinical decision making,- Self-management,- Personal care assessment,- Community delivered care,- Social participation in health	- Patient satisfaction surveys,- Patient reported outcomes,- Performance evaluation	- Comprehensive package of services,- Multidisciplinary teams	- Care pathways,- Case management,- Team-based care,- Incentives for care coordination,- Intersectoral partnerships,- Merging of health sector and social services	- Multi-disciplinary teams,- Provider support groups	improving the individual experience of care,reducing the per capita costs of care for populations
15	Knudsen et al., 2017	Qualitative	Denmark	a rheumatology clinic	3 months	- RA diagnosis - participation in tele-health follow-up	RA diagnoses	n=15	Tele-health follow-up	- to improve disease activity monitoring effectiveness	- In general, positive perceptions towards the tele-health follow-up - disadvantages related to the missing face-to-face contact with health professionals	/	Participants saw this as a flexible, time and resource saving solution. These findings call for more insight of how tele-health follow-up could be integrated in routine clinical practice.	- Personal care assessment	- Patient satisfaction surveys,- Patient reported outcomes	- Health technology assessment ,- eHealth/mHealth	- Care pathways		improving the individual experience of care,reducing the per capita costs of care for populations
16	Larsson et al., 2014	RCT	Sweden	Rheumatology clinic	12 months	- RA, undifferentiated arthritis, undifferentiated spondyloarthritis or psoriatic arthritis diagnosis	RA diagnoses,RA or other rheumatic disease	97: intervention group (n=47); control group (n=50)	A nurse-led rheumatology clinic based on person-centred care focusing on patient needs	- to improvetreatment outcomes in patients with low disease activity or in remission who are undergoing biological therapy.	- no statistically significant differences between groups in mean change of disease activity, pain, Health Assessment Questionnaire, satisfaction scores or confidence in obtaining rheumatology care	/	Patients with stable chronic inflammatory arthritis undergoing biological therapy could be monitored by a nurse-led rheumatology clinic without difference in outcome of disease activity.	- Shared clinical decision making,- Self-management,- Personal care assessment	- Patient satisfaction surveys,- Patient reported outcomes,- Performance evaluation	- Comprehensive package of services	- Care pathways,- Case management,- Team-based care	- Transformational and distributed leadership,- Change management strategies,- Workforce training	improving the individual experience of care,reducing the per capita costs of care for populations
17	Li et al., 2014	Mixed methods : outcome measures (quant.) and interviews (qual.)	Canada	Web-based	/	- RA diagnosis - candidates for methotrexate, but unsure about initiating treatment - Internet access	RA diagnoses,Changing pharmacological treatment,Ability to use telemedicine interventions	n=30	Web-based patient decision aid tool	- improve decisional quality, methotrexate knowledge, and self-management skills	- improved decisional conflict - improved knowledge of methotrexate	/	Patients’ decisional comfort and knowledge improved after using the patient decision aid.	- Health education,- Shared clinical decision making,- Self-management,- Personal care assessment	- Patient reported outcomes,- Performance evaluation	- Health technology assessment ,- eHealth/mHealth		- Provider support groups	improving the individual experience of care
18	Li et al., 2018	Mixed methods : outcome measures (quant.) and interviews (qual.)	Canada	Web-based	1 month	- RA diagnosis - had been recommended to consider adding or switching to a new biologic/small molecule agent - had an email address and Internet access	RA diagnoses,Changing pharmacological treatment,Ability to use telemedicine interventions	n=50	ANSWER-2: Web-based patient decision aid (specialized for facilitating pharmacological treatment decisions)	- to relieve patients’ decisional conflict - to improve subjective knowledge about RA and treatment, and perceived self-management attributes	- statistically significant improvments in self-management - improvement in decision making	yes	Patients’ decisional conflict decreased and perceived self-management capacity improved after using ANSWER-2.	- Health education,- Shared clinical decision making,- Self-management,- Personal care assessment	- Patient satisfaction surveys,- Patient reported outcomes,- Performance evaluation	- Health technology assessment ,- eHealth/mHealth	- Care pathways,- Case management	- Information systems,- Provider support groups	improving the individual experience of care
19	Lopez-Olivo et al., 2018	Mixed methods : knowledge scores (quant.) and interviews (qual.)	USA	/	/	- RA, OA or osteoporosis diagnosis - adequate cognitive status - not living in a nursing facility - telephone access	RA diagnoses,RA or other rheumatic disease	60 (RA: n=20)	low health‐literacy video tools: series of soap opera segments depicting the main character with OA, OP, or RA, integrated with learning modules to provide patients with factual information about their condition and treatment options	- to improve patients health literacy - to help patients better understand and manage their disease	- statistically significant differences in pre-post knowledge questionnaire scores	yes	Multimedia tools that incorporate videos may help patients better understand and manage their disease.	- Health education,- Shared clinical decision making,- Self-management,- Personal care assessment,- Social participation in health	- Patient satisfaction surveys,- Patient reported outcomes,- Performance evaluation	- Health technology assessment ,- eHealth/mHealth	- Care pathways,- Care transition,- Merging of health sector and social services		improving the individual experience of care
20	Lumley et al., 2014	RCT	USA	two medical centers	12 months	- RA diagnoses - reported pain or morning stiffness due to RA	Symptoms (fatigue, swelling, elevated psychological distress)	n=264	1st arm: written emotional disclosure (WED) 2nd arm: cognitive-behavioural coping skills training (CST)	WED: decrease stress, reduced disease activity CST: manage pain and improve functioning	- CST decreased pain and psychological symptoms - mixed results for WED: reduced disease activity and physical disability at 1 month only, more pain than control writing	limited	patients with RA benefit in the short and long-term from learning CST skills such as relaxation, cognitive reappraisal, assertive communication, distraction, increasing pleasant activities, and problem-solving.	- Health education,- Self-management	- Patient reported outcomes,- Performance evaluation		- Care pathways,- Case management,- Merging of health sector and social services		improving the individual experience of care,improving the health of populations
21	Manning et al., 2014	RCT	UK	Home-based; Training sessions (setting not mentioned)	9 months	- RA diagnosis - no contraindications to upper extremity exercise - no intramuscular or upper extremity intraarticular steroid injections in the previous 4 weeks - no upper extremity surgery or physiotherapy during the previous 6 months	RA diagnoses	108: intervention group (n=52); control group (n=56)	Education, self-management, and upper extremity exercise training (EXTRA) + individualized, functional home exercise regimen	- to improve global upper extremity disability in people with RA	- improved level of disability, function, nondominant handgrip strength, self-efficacy and disease activity	/	The EXTRA program improves upper extremity disability, function, handgrip strength, and self-efficacy in people with RA, with no adverse effects on disease activity.	- Health education,- Shared clinical decision making,- Self-management,- Personal care assessment,- Community health workers	- Patient satisfaction surveys,- Patient reported outcomes,- Performance evaluation	- Comprehensive package of services,- Multidisciplinary teams	- Care pathways,- Team-based care,- Intersectoral partnerships		improving the individual experience of care,improving the health of populations
22	Manning et al., 2015	Quantitative : a cost-utility analysis	UK	Home-based; Training sessions (setting not mentioned)	5 months	- RA diagnosis - no contraindications to upper extremity exercise - no intramuscular or upper extremity intraarticular steroid injections in the previous 4 weeks - no upper extremity surgery or physiotherapy during the previous 6 months	RA diagnoses	108: intervention group (n=52); control group (n=56)	Education, self-management, and upper extremity exercise training (EXTRA) + individualized, functional home exercise regimen	Cost-effective PA programme	- Higher mean National Health Service (NHS) costs per participant (by £82). - Lower overall costs - Higher quality-adjusted life year scores (by 0.0296)	yes	The physiotherapist-led EXTRA programme represents a cost-effective use of resources compared with usual care and leads to lower health care costs and work absence.	- Health education,- Shared clinical decision making,- Self-management,- Personal care assessment,- Community health workers	- Patient reported outcomes,- Performance evaluation	- Comprehensive package of services,- Multidisciplinary teams	- Team-based care,- Intersectoral partnerships	- Multi-disciplinary teams,- Sufficient health system financing	improving the individual experience of care,reducing the per capita costs of care for populations
23	Massone et al., 2017	Qualitative	Argentina, Chile, Colombia, Mexico	/	8 months	- RA diagnosis	RA diagnoses	n=71	Educational website for patients adapted to local patient needs	- to help patients to cope with their new life with arthritis - to improve adherence to therapy - to improve quality of life and responsibility to their own well-being	Information needs of patients were related to RA info, diet recommendations, self-care, exercise, info on pharmacological interventions	/	This project provided a comprehensive list of patient needs and interests for RA info websites	- Health education,- Shared clinical decision making,- Self-management,- Personal care assessment,- Community health workers,- Civil society, user and patient groups,- Social participation in health,- Equity goals into health sector objectives,- Outreach programmes and services	- Community participation in policy formulation and evaluation,- Health rights and entitlement ,- Patient reported outcomes	- Local health needs assessment,- Gender and cultural sensitivity ,- Health technology assessment ,- Surveillance, research and control of risks and threats to public health,- Multidisciplinary teams ,- eHealth/mHealth	- Care pathways,- Case management,- Regional/district-based health service delivery networks,- Intersectoral partnerships,- Merging of health sector and social services		improving the individual experience of care
24	Ndosi et al., 2014	RCT	UK	Rheumatology outpatient clinics	12 months	- RA diagnosis	RA diagnoses	181: nurse-led care group (n=91); rheumatologist-led care group (n=90)	- 30-min consultation led by a clinical nurse specialist - 15-min consultation led by a rheumatologist	- to determine the clinical effectiveness and cost-effectiveness of nurse-led care	- Higher cost-effectiveness with respect to cost and DAS28, but not in relation to quality-adjusted life years utility scores in the nurse-led group. - Higher general satisfaction scores in week 26 in the nurse-led group.	limited	The results provide robust evidence to support non-inferiority of nurse-led care in the management of RA.	- Personal care assessment,- Expansion of primary care	- Decentralization,- Patient satisfaction surveys,- Patient reported outcomes,- Performance evaluation		- Care pathways,- Referral and counter-referral systems,- Intersectoral partnerships	- Transformational and distributed leadership,- Change management strategies	improving the individual experience of care,reducing the per capita costs of care for populations
25	Ndosi et al., 2016	RCT	UK	Rheumatology clinic	6 months	RA diagnosis	RA diagnoses	132: control group (n=62); intervention group (n=70)	Patient education based on the patient-completed needs questionnaire - Educational Needs Assessment Tool (ENAT)	Improving patient's self-efficacy, health outcomes and patient knowledge	Significant improvement in self-efficacy, some improvment in pain and health status	yes	needs-based education helps improve patients’ self-efficacy and some aspects of health status	- Health education,- Shared clinical decision making,- Self-management,- Personal care assessment,- Social participation in health,- Expansion of primary care	- Patient reported outcomes,- Performance evaluation	- Local health needs assessment,- Comprehensive package of services	- Care pathways,- Case management,- Team-based care,- Merging of health sector and social services	- Quality assurance	improving the individual experience of care,improving the health of populations,provider well-being
26	Nishiguchi et al., 2016	Quantitative	Japan	Remote (smartphone application)	3 months	- RA diagnosis - Smartphone users	RA diagnoses,Ability to use telemedicine interventions	n=9	Measuring disease activity score (DAS28) using a smartphone application	- investigate the feasibility of a self-assessment system via smartphone application	The disease activity measured by the application correlated with the patients' actual disease activity.	/	The DAS28 predictive model may be an acceptable and useful tool for assessment of RA disease activity.	- Self-management,- Personal care assessment,- Community delivered care,- Outreach programmes and services,- Expansion of primary care	- Patient reported outcomes,- Performance evaluation	- Health technology assessment ,- eHealth/mHealth	- Case management,- Care transition	- Change management strategies,- Information systems	improving the health of populations,reducing the per capita costs of care for populations,provider well-being
27	Noben et al., 2017	Quantitative : Twelve month follow-up economic evaluation	the Netherlands	- specialized rheumatology treatment centers - participant's workplace	/	- RA diagnosis - payed job of 8h+ per week - experiencing difficulties at work	RA diagnoses,Employment status,Symptoms (fatigue, swelling, elevated psychological distress)	150: intervention (n = 75); control group- care-as-usual (CAU) (n = 75)	- integrated care by a multidisciplinary team - participatory ergonomics at work to find feasible solutions for obsticles at work	Improving at-work productivity loss	- at-work productivity loss was greater in the intervention group, - differences in QALY were negligible - negative results for intervention's cost-effectiveness and cost-utility analysis	/	less effective and more expensive (compared to usual care)	- Shared clinical decision making,- Self-management,- Personal care assessment,- Social participation in health	- Performance evaluation	- Comprehensive package of services,- Multidisciplinary teams	- Care pathways,- Case management,- Team-based care,- Incentives for care coordination,- Intersectoral partnerships,- Merging of health sector and social services
28	Nordgren et al., 2015	Quantitative,Cohort	Sweden	Public training centers; Support group meetings (setting not mentioned)	12 months	- RA diagnosis - independent in daily living	RA diagnoses,Independent in daily living	n=220	- daily physical activity - twice-weekly circuit training - biweekly support group meetings	- to document adherence to and changes in health-enhancing physical activity levels and self-reported and assessed functioning	- self-reported current and maintained HEPA increased. - a number of self-reported disease-related and psychosocial factors improved. - exercise self-efficacy declined	limited	The outsourced health-enhancing physical activity programme had high retention and reasonable adherence.	- Health education,- Shared clinical decision making,- Self-management,- Personal care assessment,- Community delivered care,- Social participation in health,- Contracting out,- Expansion of primary care	- Decentralization,- Patient satisfaction surveys,- Patient reported outcomes,- Performance evaluation	- Comprehensive package of services,- Multidisciplinary teams	- Care pathways,- Team-based care,- Intersectoral partnerships,- Merging of health sector and social services	- Multi-disciplinary teams,- Provider support groups	improving the individual experience of care
29	Nota et al., 2016	Quantitative,NRS	the Netherlands	Teaching hospitals; Web-based participation	24 months	- RA, PsA or AS diagnosis - discussing initiating a disease modifying anti-rheumatic drug	RA diagnoses,RA or other rheumatic disease,Changing pharmacological treatment	281: intervention group (n=123); comparison group (n=158)	Web-based patient decision aid	- To facilitate shared decision-making and support patients in choosing between drugs	- intervention perceived as easy to use and helpful by patients - more active patients' role in medical decision-making - decisions that are more in line with patients’ personal preferences	yes	The PtDA can be a valuable aid in improving patient participation in decision-making about disease modifying anti-rheumatic drugs.	- Health education,- Shared clinical decision making,- Personal care assessment,- Social participation in health	- Patient satisfaction surveys,- Patient reported outcomes	- eHealth/mHealth	- Care pathways,- Case management,- Care transition,- Team-based care	- Information systems	improving the individual experience of care
30	Pot-Vaucel et al., 2016	RCT	France	Rheumatology department at hospital	6 months	- RA diagnosis - stable disease activity	RA diagnoses,Low/stable disease activity	54: intervention group (n=28); control group (n=26)	Patient therapeutic education provided by a social worker, occupational therapist, dietician, psychologist, chiropodist or participation in joint workshops	- facilitate solution finding applicable to the particular patient situation	- intervention group had a higher level of satisfaction (76.9%) after solving the proposed problems than the control group (42.4%)	yes	Customized patient therapeutic education could better respond to specific patients problems in RA	- Health education,- Shared clinical decision making,- Self-management,- Personal care assessment,- Social participation in health,- Expansion of primary care	- Patient satisfaction surveys,- Patient reported outcomes	- Local health needs assessment,- Comprehensive package of services,- Multidisciplinary teams	- Care pathways,- Case management,- Team-based care,- Intersectoral partnerships,- Merging of health sector and social services	- Transformational and distributed leadership,- Change management strategies,- Multi-disciplinary teams	improving the individual experience of care
31	Primdahl et al., 2014	RCT	Denmark	Outpatient	24 months	- RA diagnosis (>1.5y) - Low disease activity - No increase in disease modifying antirheumatic drugs or steroids for the past 3 months	RA diagnoses,Low/stable disease activity	287: rheumatologist care group (n=97); shared care group (n=96); nursing care group (n=94)	- Shared care group: discussions with GPs or clinically experienced rheumatology outpatient nurses via a nurse-led telephone helpline - Nursing care group: consultations with a clinically experienced rheumatology outpatient nurse	- to compare patient outcomes in alternative regimes of follow-up care with traditional follow-up with rheumatologists	- lower disease activity in the nursing care group - increased self-efficacy, confidence and satisfaction in the nursing care group - transient lower satisfaction in the shared care group	yes	It is safe to implement shared care and nursing consultations as alternatives to rheumatologist consultations. Nursing consultations can enhance patients’ self-efficacy, confidence and satisfaction.	- Shared clinical decision making,- Self-management,- Personal care assessment,- Expansion of primary care	- Patient satisfaction surveys,- Patient reported outcomes,- Performance evaluation	- Comprehensive package of services,- Multidisciplinary teams	- Care pathways,- Referral and counter-referral systems,- Team-based care		improving the individual experience of care,improving the health of populations,reducing the per capita costs of care for populations
32	Salaffi et al., 2016	RCT	Italy	Rheumatology clinic	12 months	- RA diagnosis - disease duration <1 year - disease activity (CDAI ≥22)	RA diagnoses,Newly diagnosed	41: intervention group (n=21); control group (n=20)	intensive telemonitoring of disease activity + protocolised treatment adjustments	- to facilitate achieving remission and disease control	- More patients achieved clinical remission (38.1% vs 25%) - Shorter time to achieve remission (a median of 20 weeks vs 36 weeks) - Greater level of functional improvement (71.4% vs 35%) - Greater level of disease control (19.4% vs 5%)	yes	Intensive treatment strategy by telemonitoring leads to more effective disease remission and more rapid comprehensive disease control.	- Health education,- Shared clinical decision making,- Outreach programmes and services,- Expansion of primary care	- Decentralization,- Patient reported outcomes,- Performance evaluation	- Health technology assessment ,- eHealth/mHealth	- Care pathways,- Case management	- Change management strategies,- Information systems,- Systems research and knowledge management	improving the individual experience of care,improving the health of populations,reducing the per capita costs of care for populations,provider well-being
34	Shadick et al., 2013	RCT	USA	Web-based	9 months	- RA diagnosis - stable RA medication regimen - no previous exposure to self-management interventions - no uncontrolled psychiatric diagnoses and medical comorbidities	RA diagnoses	106: intervention group (n=54); control group (n=52)	An educational, cognitive–behavioral, self‐management, peer support program (RAHelp), with weekly telephone support	- improve self-efficacy in self-management of RA	- statistically significant improvements in immediate and persisting self-efficacy and quality of life	yes	RAHelp appears to have beneficial effects in terms of self-efficacy and quality of life among individuals with RA who are willing to use an online service format. Thed program has potential for scalability.	- Health education,- Shared clinical decision making,- Self-management,- Personal care assessment,- Community delivered care,- Community health workers,- Civil society, user and patient groups,- Social participation in health,- Equity goals into health sector objectives,- Outreach programmes and services,- Expansion of primary care	- Patient satisfaction surveys,- Patient reported outcomes,- Performance evaluation	- Comprehensive package of services,- Health technology assessment ,- eHealth/mHealth	- Care pathways,- Case management,- Merging of health sector and social services		improving the individual experience of care,improving the health of populations
33	Shadick et al., 2013	RCT	USA	Arthritis hospital center	9 months	- RA diagnosis - active disease	RA diagnoses,Symptoms (fatigue, swelling, elevated psychological distress)	79: Internal Family System (n = 39); education (control) group (n=40)	Internal Family System psychotherapeutic model	- to improve psychological status of RA patients	- improved overall pain and physical function scores in the intervention group - improved self-assessed joint pain, self-compassion and depressive symptoms scores sustained 1 year later - no sustained improvements in anxiety, self-efficacy, or disease activity	/	An Internal Family System-based psychotherapeutic intervention is feasible and acceptable to patients with RA and may complement medical management of the disease.	- Health education,- Shared clinical decision making,- Self-management,- Personal care assessment,- Community health workers,- Social participation in health	- Patient reported outcomes,- Performance evaluation	- Comprehensive package of services,- Multidisciplinary teams	- Care pathways,- Team-based care,- Intersectoral partnerships,- Merging of health sector and social services		improving the individual experience of care
35	Simmons et al., 2017	Qualitative	UK	By telephone; face-to-face (setting not mentioned)	4 months	- RA diagnosis	RA diagnoses	n=11	Digital health interventions (DHI) for increasing physical activity	To increase physical activity, facilitate behaviour change, provide decision support, to educate	- low awareness and use of digital health interventions - participants were willing to use DHIs for features such PA monitoring - low tech approaches were prefered by some.	/	Facilitating behaviour change through addressing the provision of appropriate information, signposting to accessible facilities, and provision of emotional or decision support may be important to encourage PA maintenance.	- Health education,- Personal care assessment,- Social participation in health	- Patient reported outcomes	- Health technology assessment	- Care pathways	- Information systems	improving the individual experience of care
36	Solomon et al., 2015	Quantitative,Cohort	USA	Rheumatology practices	24 months	- RA diagnosis - ≥2 different visits with an RA disease activity measures	RA diagnoses	301: nurse practitioner (NP) or physician assistant (PA) group (n=158); rheumatologist only group (n=143)	- care delivered in rheumatology practices with NPs or PAs	- to examine the process and outcomes of care provided by NPs or PAs	- patients seen in practices with NPs or PAs were less likely to have higher disease activity	limited	Disease activity control was not inferior and may have actually been slightly better in the NP or PA practices as compared with practices using rheumatologists only.	- Shared clinical decision making,- Personal care assessment,- Contracting out,- Expansion of primary care	- Decentralization,- Performance evaluation	- Comprehensive package of services,- Multidisciplinary teams	- Care pathways,- Case management,- Team-based care,- Intersectoral partnerships	- Transformational and distributed leadership,- Change management strategies,- Workforce training,- Multi-disciplinary teams	improving the health of populations,reducing the per capita costs of care for populations
37	Sorensen et al., 2015	Quantitative : cost-effectiveness based on a 2-year randomized trial	Denmark	Rheumatology outpatient clinics	24 months	- RA diagnosis (≥18 months) - low disease activity - no increase in use of disease-modifying anti-rheumatic drugs or steroids during the past 3 months	RA diagnoses,Low/stable disease activity	287: rheumatologist group (n=97); shared care group (n=96); nurse care group (n=94)	1. Rheumatologist conslutations 2. Telephone discussions with GPs or outpatient nurses + annual hospital review 3. Specialized rheumatology outpatient nurse consultations	- to establish the cost-effectiveness of the three types of outpatient RA follow-up care - improvement of health-related outcomes in outpatient RA follow-up care	- better mean scores, better health-related quality of life and lower costs in the shared care and nurse care groups - shared care and nurse care were cost-effective with more than 90% probability - nurse care was cost-effective in comparison with shared care with 75% probability	/	nurse care and shared care cost slightly less and provide broadly similar health outcomes compared with rheumatologist outpatient care in patients with stable low-active	- Health education,- Shared clinical decision making,- Self-management,- Personal care assessment,- Expansion of primary care	- Decentralization,- Clinical governance,- Patient satisfaction surveys,- Patient reported outcomes,- Performance evaluation,- Performance based financing and contracting	- Comprehensive package of services,- Multidisciplinary teams	- Case management,- Team-based care,- Intersectoral partnerships	- Transformational and distributed leadership,- Change management strategies,- Multi-disciplinary teams	improving the health of populations,reducing the per capita costs of care for populations
38	Thomsen et al., 2017	RCT	Denmark	rheumatology outpatient clinic	4 months	patients with RA	RA diagnoses,Ability to use telemedicine interventions,Insufficient physical activity	150: control, no-intervention (n=75); intervention (n=75)	individually tailored motivational counselling sessions (three times), text messages	reducing daily sitting time, pain, fatigue, improving health-related quality of life, self-efficacy, physical function and cardiometabolic biomarkers	intervention group: - reduced daily sitting time in the - increased standing and stepping time - self-reported improvement in fatigue, pain, physical function, QoL, general self-efficacy and in total cholesterol - a significant proportion achieved clinically meaningful improvements in physical function (HAQ), fatigue (Visual Analogue Scale), and pain	yes	intervention seems effective for reducing daily sitting time in patients with RA	- Health education,- Self-management,- Personal care assessment,- Social participation in health	- Patient reported outcomes	- Home and nursing care,- eHealth/mHealth	- Care pathways,- Case management,- Merging of health sector and social services		improving the individual experience of care,improving the health of populations
39	Unk et al., 2014	RCT	USA	Rheumatology clinic	1 month	- RA diagnosis	RA diagnoses	108: 54 per group	multimedia educational program (audio PowerPoint program)	- improve RA related knowledge - improve self-reported medication adherance	- no measurable or meaningful differences between the multimedia intervention and education by literature - self-reported medical adherence did not improve	/	multimedia may be useful to educate patients but it was not found to be superior to info handouts. Certain multimedia features may help overcome health literacy barriers.	- Health education,- Self-management,- Equity goals into health sector objectives,- Outreach programmes and services	- Health rights and entitlement ,- Patient reported outcomes,- Performance evaluation		- Care pathways,- Care transition
40	Van Den Bosch et al., 2017	Quantitative,NRS	EU, Israel, Mexico, Puerto Rico, and Australia	Various	18 months	- RA diagnosis - treated with adalimumab (ADA)	RA diagnoses	1025 - intervention group, n=499; control, n=526	proprietary patient support program (PSP, AbbVie Care): a starter pack, injection guide, educational material regarding life, booklet or DVD about the disease, call centers (in and outbound)/hotline, nursing services	improve functional, clinical, and patient-reported outcomes	Intervention group: - significant improvement in treatment and patient-reported outcomes - overall greater improvement in clinical, functional, and patient-reported outcomes	yes	participation in a PSP can have a positive effect on clinical and quality of life outcomes in RA patients such as physical functioning, treatment satisfaction, and activities impairment and may also have an impact on the treatment persistence and adherence	- Health education,- Shared clinical decision making,- Self-management,- Personal care assessment,- Community delivered care,- Civil society, user and patient groups,- Social participation in health,- Expansion of primary care	- Patient satisfaction surveys,- Patient reported outcomes,- Performance evaluation		- Care pathways,- Case management,- Intersectoral partnerships,- Merging of health sector and social services		improving the individual experience of care,improving the health of populations,reducing the per capita costs of care for populations
41	van Vilsteren et al., 2016	Quantitative : process evaluation alongside an RCT	the Netherlands	- specialized rheumatology treatment centers - participant's workplace	12 months	- RA diagnosis - payed job of 8h+ per week - experiencing difficulties at work	RA diagnoses,Employment status,Symptoms (fatigue, swelling, elevated psychological distress)	150: intervention (n = 75); control group- care-as-usual (CAU) (n = 75)	- integrated care by a multidisciplinary team - participatory ergonomics at work to find feasible solutions for obstacles at work	Improving at-work productivity loss	- Integrated care was delivered according to protocol for 46.7 %, while the participatory workplace intervention was delivered for 80.6 %. - Participants implemented 70% of the workplace adaptations proposed during the participatory workplace intervention (dose received). - The fidelity score for both integrated care and the participatory workplace intervention was sufficient. - Participants were…	/	intervention was not entirely implemented as intended	- Shared clinical decision making,- Self-management,- Personal care assessment,- Community delivered care,- Social participation in health,- Peer support	- Patient satisfaction surveys,- Patient reported outcomes,- Performance evaluation	- Comprehensive package of services,- Multidisciplinary teams	- Care pathways,- Case management,- Team-based care,- Incentives for care coordination,- Intersectoral partnerships,- Merging of health sector and social services	- Multi-disciplinary teams
42	van Vilsteren et al., 2017	RCT	the Netherlands	- specialized rheumatology treatment centers - participant's workplace	12 months	- RA diagnosis - payed job of 8h+ per week - experiencing difficulties at work	RA diagnoses,Employment status,Symptoms (fatigue, swelling, elevated psychological distress)	150: intervention (n = 75); control group- care-as-usual (CAU) (n = 75)	- integrated care by a multidisciplinary team - participatory ergonomics at work to find feasible solutions for obstacles at work	Improving at-work productivity loss	no statistically significant effect of the intervention on at-work productivity loss, work instability, pain, fatigue, and quality of life	/	no intervention effects on any outcome, no evidence for the effectiveness of the intervention	- Shared clinical decision making,- Self-management,- Personal care assessment,- Social participation in health,- Expansion of primary care	- Patient reported outcomes,- Performance evaluation	- Comprehensive package of services,- Multidisciplinary teams	- Care pathways,- Case management,- Team-based care,- Incentives for care coordination,- Intersectoral partnerships,- Merging of health sector and social services
43	van Vilsteren et al., 2017	RCT	the Netherlands	- specialized rheumatology treatment centers - participant's workplace	6 months RTC follow-up	- RA diagnosis - payed job of 8h+ per week - experiencing difficulties at work	RA diagnoses,Employment status,Symptoms (fatigue, swelling, elevated psychological distress)	150: intervention (n = 75); control group- care-as-usual (CAU) (n = 75)	- integrated care by a multidisciplinary team - participatory ergonomics at work to find feasible solutions for obstacles at work	Improving supervisor support, work instability and at-work productivity loss	- Integrated care intervention has statistically significant favorable effect on supervisor support, but no effect on work instability and overall at-work productivity loss.	/	Workplace intervention is likely to improve supervisor support. Patients with RA are in need of efforts to support them in their work functioning.	- Shared clinical decision making,- Self-management,- Personal care assessment,- Social participation in health,- Peer support	- Performance evaluation	- Comprehensive package of services,- Multidisciplinary teams	- Care pathways,- Case management,- Team-based care,- Incentives for care coordination,- Intersectoral partnerships,- Merging of health sector and social services	- Multi-disciplinary teams	improving the individual experience of care
44	Väre et al., 2016	Quantitative : patient satisfaction questionaires	Finland	Rheumatology clinic	3 weeks	- RA, ankylosing spondylitis, psoriatic arthritis, polymyalgia rheumatica, vasculitides, myositis, and lupus diagnosis	RA diagnoses,RA or other rheumatic disease	n=141	Jyvaskyla rheumatology clinic model providing one-stop, multi-disciplinary, integrated, and patient-centered service: electronic check-in, an electronic monitoring system for patient-reported outcomes, rheumatologist consultation, nurse consultation, possibility to schedule nutritionist or physiotherapist on the same day	- to enhance the patient “journey” through rheumatology services	- A patient satisfaction survey revealed high rating of the overall service (90.6/100).	/	Where possible, the specific clinic model could be used or adapted to build similar models in other rheumatology departments.	- Health education,- Shared clinical decision making,- Self-management,- Personal care assessment,- Equity goals into health sector objectives,- Expansion of primary care	- Patient satisfaction surveys,- Patient reported outcomes,- Performance evaluation	- Local health needs assessment,- Comprehensive package of services,- Gender and cultural sensitivity ,- Multidisciplinary teams ,- eHealth/mHealth	- Care pathways,- Referral and counter-referral systems,- Case management,- Care transition,- Team-based care,- Incentives for care coordination,- Intersectoral partnerships,- Merging of health sector and social services	- Transformational and distributed leadership,- Change management strategies,- Information systems,- Continuous quality improvement,- Workforce training,- Multi-disciplinary teams	improving the individual experience of care,improving the health of populations,provider well-being
45	Vermaak et al., 2015	Quantitative : one group (within subjects) repeated measures study	Australia	Rheumatology outpatient department; community setting	12 months	- RA diagnosis	RA diagnoses	n=113	Self-management education program focused on individual weekly goal setting, problem solving, relaxation techniques, and cognitive behavioural therapy	- improve health related outcomes	- significant immediate improvements in mean fatigue, depression and SF-36 mental health - long term benefits for depression and SF-36 subscales mental health, role emotional, role physical and physical function	yes	Significant improvements in depression and mental health post-intervention, which were maintained to 12 months follow up.	- Health education,- Shared clinical decision making,- Self-management,- Personal care assessment,- Community delivered care,- Community health workers	- Patient satisfaction surveys,- Patient reported outcomes,- Performance evaluation	- Multidisciplinary teams	- Case management,- Team-based care		improving the individual experience of care,improving the health of populations,reducing the per capita costs of care for populations
46	Wang et al., 2017	RCT	China	Outpatient rheumatology clinic	12 months	- RA diagnosis (>1y) - no severe disability or having unstable diseases	RA diagnoses,Low/stable disease activity	220: nurse-led care group (n=110), rheumatologist-led care group (n=110)	Nurse-led care model (compared to rheumatologist-led care group)	- provide comparable outcomes to standard care	- significantly higher overall patient satisfaction in the nurse care group - significantly greater improvement in disease activity over 12 months of follow in the nurse-led care group - significantly greater improvement in pain, fatigue and duration of morning stiffness over 12 months of follow in the nurse-led care group	yes	Patients with RA managed by nurses had significantly higher patient satisfaction, and had significantly greater improvement in disease symptoms than rheumatologist-led care.	- Health education,- Shared clinical decision making,- Personal care assessment,- Expansion of primary care	- Patient satisfaction surveys,- Patient reported outcomes,- Performance evaluation	- Comprehensive package of services,- Home and nursing care	- Care pathways,- Referral and counter-referral systems,- Case management,- Care transition,- Intersectoral partnerships	- Transformational and distributed leadership,- Change management strategies,- Quality assurance	improving the individual experience of care,improving the health of populations,reducing the per capita costs of care for populations
47	Watts et al., 2015	Quantitative,NRS	UK	Primary and secondary care	12 months	- RA diagnosis - no severe functional impairment or very active unstable disease	RA diagnoses,Moderate/high disease activity,Symptoms (fatigue, swelling, elevated psychological distress)	349: community-based nurse-led care (n=195); rheumatologist-led outpatient care (n=154)	Community-based nurse-led care	- improve the cost-effectiveness of the follow-up care of patients with RA	- £224 less mean incremental total NHS cost in the hospital group	/	Community care may be associated with non-significant higher costs with no significant differences in clinical outcomes, and this suggests a low probability that it is cost-effective.	- Shared clinical decision making,- Community delivered care,- Community health workers,- Outreach programmes and services,- Expansion of primary care	- Decentralization,- Performance evaluation,- Performance based financing and contracting	- Local health needs assessment,- Primary care with family and community-based approach,- Multidisciplinary teams	- Care pathways,- Referral and counter-referral systems,- Care transition,- Regional/district-based health service delivery networks,- Merging of health sector and social services	- Transformational and distributed leadership,- Change management strategies	improving the individual experience of care,reducing the per capita costs of care for populations
48	Yousefi et al., 2015	RCT	Iran	Community rheumatology center	15 months	- RA diagnoses - low/stable disease activity	RA diagnoses,Low/stable disease activity	206: intervention group (n=100); control group (n=106)	Self-management modular program group intervention: interdisciplinary instruction, counseling, and physical therapy (exercises)	- improve health outcomes, knowledge, attitudes, and practices of patients with RA.	- clinically significant improvements on the physical component scale, mental component scale and quality of life	limited	The modular program group intervention appears to be a suitable and feasible method to facilitate management of early RA in socioeconomically challenged communities.	- Health education,- Shared clinical decision making,- Self-management,- Personal care assessment,- Community delivered care,- Community health workers,- Social participation in health,- Peer support ,- Expansion of primary care	- Patient satisfaction surveys,- Patient reported outcomes	- Local health needs assessment,- Comprehensive package of services,- Primary care with family and community-based approach,- Multidisciplinary teams	- Care pathways,- Team-based care,- Intersectoral partnerships,- Merging of health sector and social services	- Change management strategies,- Workforce training,- Multi-disciplinary teams	improving the individual experience of care,improving the health of populations
49	Zernicke et al., 2016	RCT,Mixed methods : crossover trail and interviews	Germany	Out-patient department of the department of rheumatology; at homes	6 months	- RA diagnosis - advanced RA with low disease activity	RA diagnoses,Low/stable disease activity	30: intervention group (n=15); control group (n=15)	Animated exercise program using a game console	- assess the feasibility and benefits of home-based animated physical exercises programs in RA	Comparable outcomes of functional tests between regular home exercise programme and animated consol-based exercise programme	/	Animated home-based exercise program by using a Wii game console was feasible and beneficial for RA patients, and might be an alternative supportive option for RA patients.	- Self-management,- Personal care assessment	- Patient reported outcomes,- Performance evaluation	- eHealth/mHealth	- Care pathways,- Case management,- Care transition,- Merging of health sector and social services		improving the individual experience of care
50	Zwikker et al., 2014	RCT	the Netherlands	training sessions (setting not mentioned)	12 months	- RA diagnosis (≥1y) - using disease modifying antirheumatic drugs - no severe mental or physical constraints	RA diagnoses	123: intervention group (n=63); control group (n=60)	motivational interviewing guided group sessions	- to balance beliefs about medication - to improve medication adherence in non-adherent patients	- less strong necessity beliefs about medication in the intervention group at 12 months’ follow-up	/	This trial did not demonstrate superiority of group session intervention over the control arm in changing beliefs about medication or in improving medication adherence over time.	- Health education,- Shared clinical decision making,- Self-management,- Community delivered care	- Patient reported outcomes,- Performance evaluation		- Case management,- Team-based care,- Intersectoral partnerships
